# Supplementary material for: Interaction between alk1 and blood flow in the development of arteriovenous malformations
Source: Oxford University Press journal article supplement (doi:10.1242/dev.060467), 2011-03-10
Supplement: dev060467tables1.pdf [file dev060467tables1.pdf]

**Table S1. Plasmids used to generate riboprobes\***

| cDNA          | Insert information                                   | Restriction enzyme | Polymerase |
|---------------|------------------------------------------------------|--------------------|------------|
| <i>alk1</i>   | FP: GGCCTGGGTCTCGTCTT<br>RP: AACCCATCTTACCCTCACTTTAC | <i>SpeI</i>        | T7         |
| <i>cxcr4a</i> | FP: TCTTATCGGGAACGGACTGG<br>RP: CTGCGAGCGGACTTCTTGA  | <i>NotI</i>        | SP6        |
| <i>edn1</i>   | EST Fb14d01; accession number AI385034               | <i>SaII</i>        | T7         |
| <i>cdh5</i>   | 5' RACE product                                      | <i>NotI</i>        | Sp6        |
| <i>klf2a</i>  | FP: CGGTGCATGCATGAGATCC<br>RP: GGCTTCTCGCCTGTGTGT    | <i>SpeI</i>        | T7         |

\*All inserts are in pCRII-TOPO (Invitrogen), except *edn1* (pBK-CMV).
